# Supplementary material for: Near-infrared (1550 nm) in vivo bioimaging based on rare-earth doped ceramic nanophosphors modified with PEG-b-poly(4-vinylbenzylphosphonate)
Source: Royal Society of Chemistry journal article supplement (doi:10.1039/c1nr10466g), 2011-01-01
Supplement: c1nr10466g.pdf [file c1nr10466g.pdf]

## Electronic Supplementary Information (ESI)

### Near-infrared (1550 nm) In Vivo Bioimaging Based on Rare-earth Doped Ceramic Nanophosphors Modified with PEG-*block*-poly(4-vinylbenzylphosphonate)

Masao Kamimura,<sup>a</sup> Naoki Kanayama,<sup>a</sup> Kimikazu Tokuzen,<sup>b</sup> Kohei Soga,<sup>b</sup>  
and Yukio Nagasaki <sup>\*acd</sup>

<sup>a</sup>Department of Materials Sciences, Graduate School of Pure and Applied Sciences, University of Tsukuba, Tennoudai 1-1-1, Tsukuba, Ibaraki, 305-8573, Japan.

<sup>b</sup>Department of Materials Science and Technology, Tokyo University of Science, 2461 Yamazaki, Noda, Chiba, 278-8510, Japan. <sup>c</sup>Master's School of Medical Sciences, Graduate School of Comprehensive Human Sciences, University of Tsukuba, Tennoudai 1-1-1, Tsukuba, Ibaraki, 305-8573, Japan. <sup>d</sup>Satellite Laboratory, International Center for Materials Nanoarchitectonics (MANA), National Institute for Materials Science (NIMS), University of Tsukuba, Tennoudai 1-1-1, Tsukuba, Ibaraki 305-8573, Japan.

To whom correspondence should be addressed: Prof. Yukio Nagasaki (Phone: +81-29-853-5749. Fax: +81-29-853-5749. e-mail: yukio@nagalabo.jp)

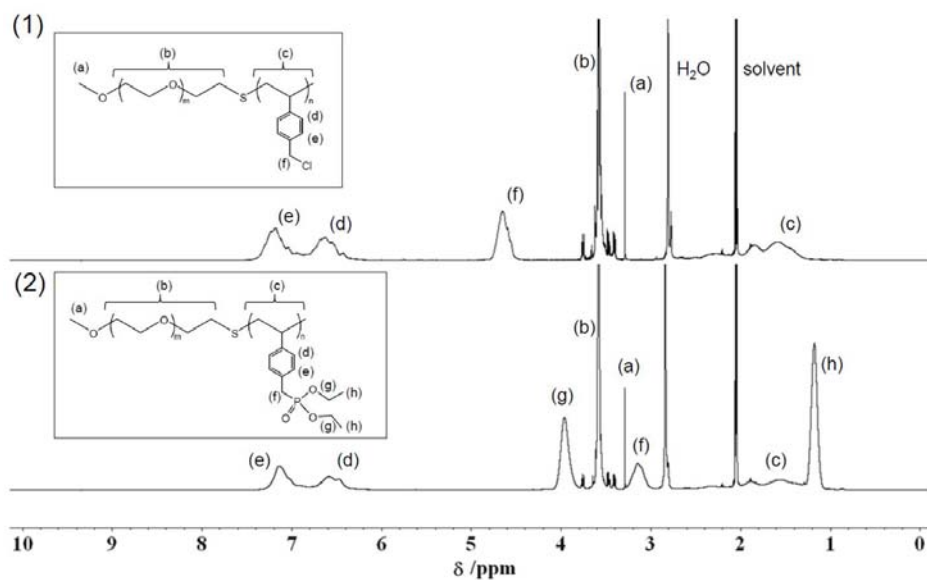

**Fig. S1.**  $^1\text{H-NMR}$  spectra of (1) PEG-*b*-PCMS and (2) PEG-*b*-PDEVBP. (400 MHz, acetone- $d_6$ , room temperature).

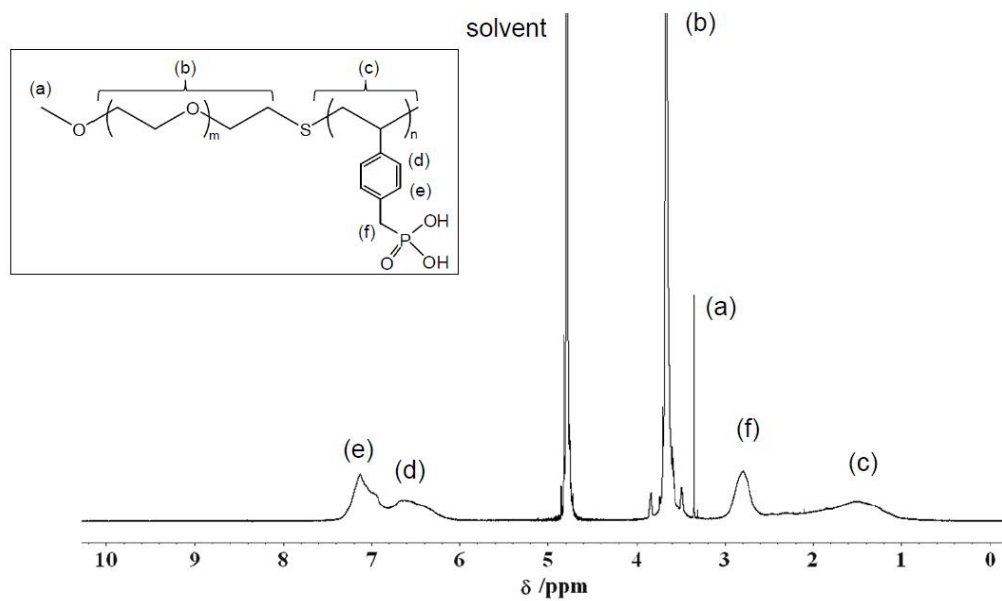

**Fig. S2.**  $^1\text{H-NMR}$  spectrum of PEG-*b*-PVBP. (400 MHz, deuterium oxide/sodium deuterioxide (pD = 9.0), room temperature).

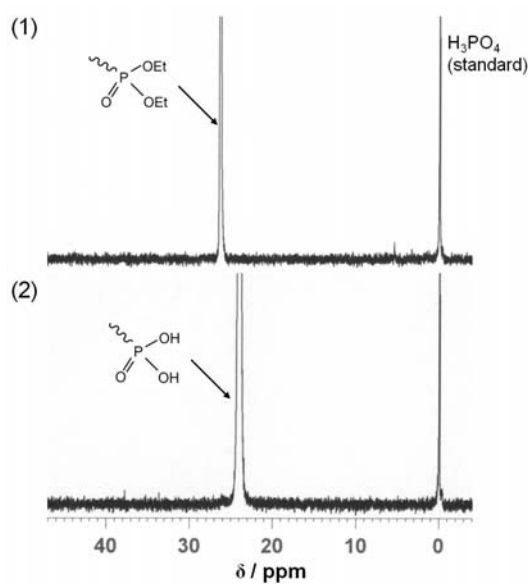

**Fig. S3.**  $^{31}\text{P}$ -NMR spectra of (1) PEG-*b*-PDEVBP and (2) PEG-*b*-PVBP. (600 MHz, methanol- $d_4$ , room temperature).

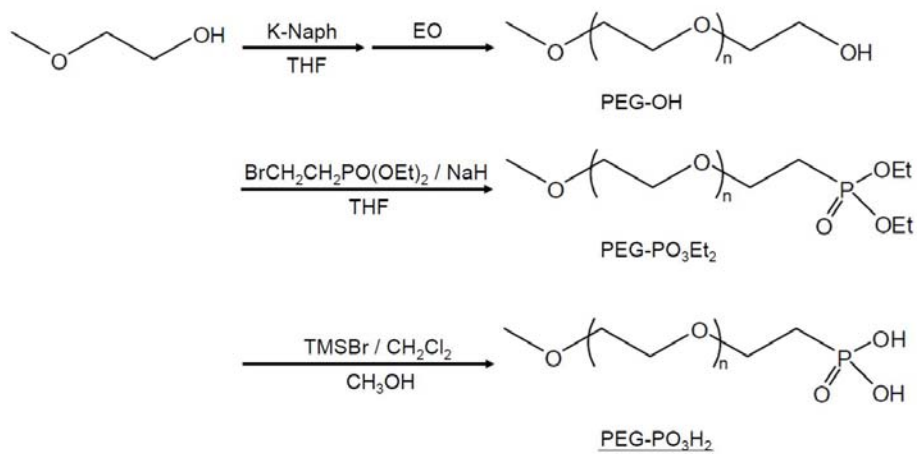

**Scheme S1.** Schematic representation of PEG-PO<sub>3</sub>H<sub>2</sub> synthesis.

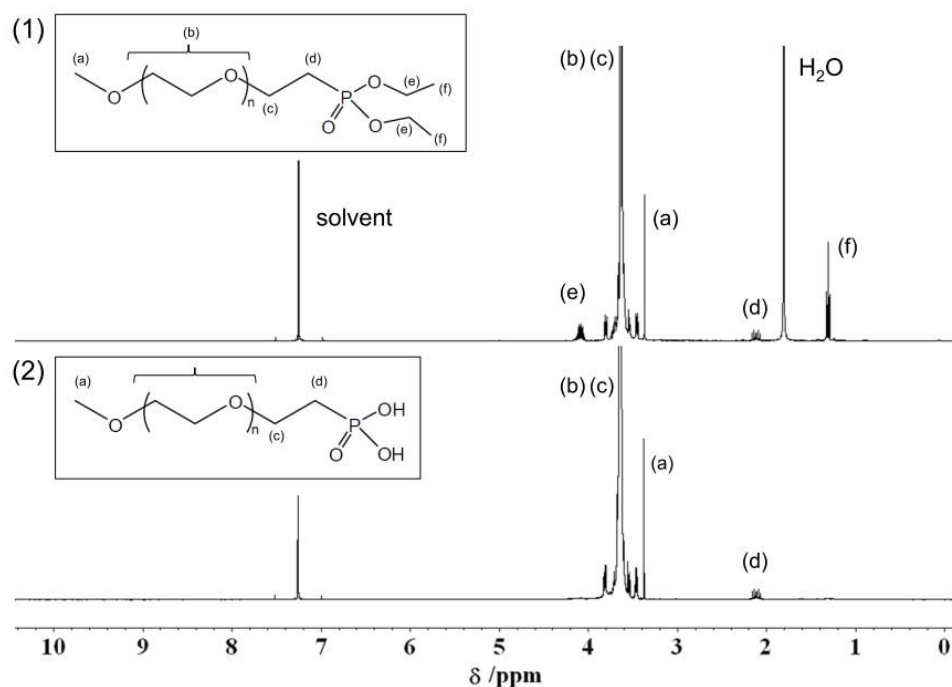

**Fig. S4.**  $^1\text{H-NMR}$  spectra of (1) PEG- $\text{PO}_3\text{Et}_2$  and (2) PEG- $\text{PO}_3\text{H}_2$ . (400 MHz, chloroform- $d_1$ , room temperature).

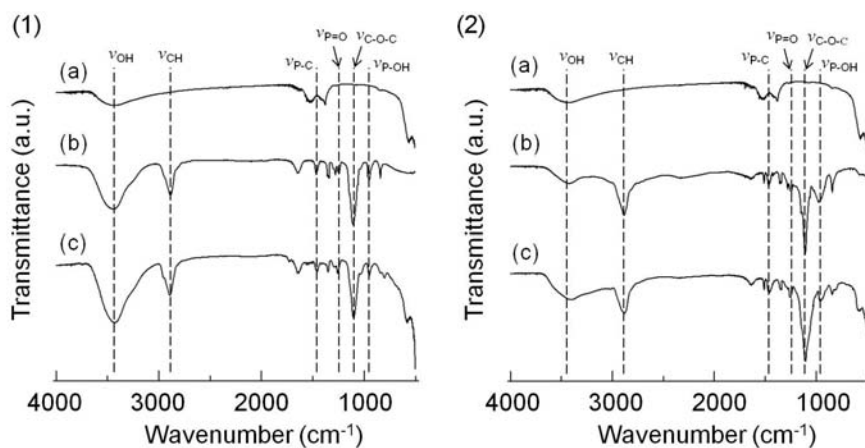

**Fig. S5.** (1) FT-IR spectra of YNPs absorbed with PEG- $\text{PO}_3\text{H}_2$ . (a) native-YNPs, (b) PEG- $\text{PO}_3\text{H}_2$  polymer alone, and (c) PEG-YNP(1)s. (2) FT-IR spectra of YNPs absorbed with PEG-*b*-PVBP. (a) native-YNPs, (b) PEG-*b*-PVBP polymer alone, and (c) PEG-YNP(*b*)s.

Table S1. PEG brush density on the YNP surface

| Sample              | Weight loss at 900 °C (%) | PEG brush density (chains nm <sup>-2</sup> )* |
|---------------------|---------------------------|-----------------------------------------------|
| PEG-YNP(1)          | 11.0                      | 1.30                                          |
| PEG-YNP( <i>b</i> ) | 2.1                       | 0.14                                          |

Start temperature : 140 °C, 30 min, rate of temperature increase : 10 °C/min, end temperature: 900 °C.

\* PEG brush density was determined by the weight loss assuming all PEG is adsorbed on the YNP surface.

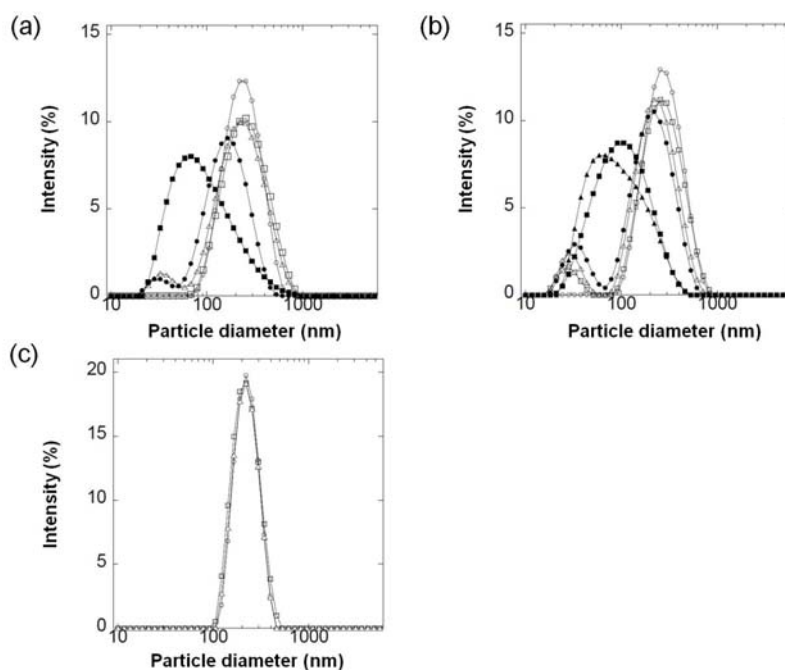

**Fig. S6.** Variation with time of the size distribution of YNP samples under acidic conditions. (a) native-YNPs. (Open circle) 0 min, (open square) 5 min, (open triangle) 10 min, (close circle) 15 min and (close square) 20 min. (b) PEG-YNP(1)s. (Open circle) 0 min, (open square) 10 min, (open triangle) 20 min, (close circle) 30 min, (close square) 40 min, and (close triangle) 60 min. (c) PEG-YNP(*b*)s. (Close diamond) 0 h, (open square) 24 h, and (close triangle) 48 h. (DLS measurement: room temperature, pH5.0).
